# Supplementary material
Source: publisher site journal article supplement (https://www.spandidos-publications.com/3241/downloadSupplementary)
Supplement: Supplementary file 2 [file downloadSupplementary]

## Sheet: Sheet1
Table SI. Association between mutations in driver genes and clinicopathological characteristics.
Clinicopathological characteristics	Number of patients	EGFR		PTEN		KRAS		PIK3CA		BRAF		ERBB2		RET		ALK		FBXW7		KIT		MET		NRAS		APC
		Mutations, n	P-value	Mutations, n	P-value	Mutations, n	P-value	Mutations, n	P-value	Mutations, n	P-value	Mutations, n	P-value	Mutations, n	P-value	Mutations, n	P-value	Mutations, n	P-value	Mutations, n	P-value	Mutations, n	P-value	Mutations, n	P-value	Mutations, n	P-value
Total	97	49		36		9		8		6		4		4		3		2		2		1		1		1
Sex
Male	46	16	0.003	14	0.196	8	0.012	5	0.471	1	0.208	0	0.119	2	1	2	0.602	0	0.496	2	0.222	1	0.474	1	0.474	1	0.474
Female	51	33		22		1		3		5		4		2		1		2		0		0		0		0
Age (years)
≤60	56	29	0.77	23	0.346	8	0.103	7	0.132	3	0.695	2	1	2	1	2	>0.999	0	0.176	1	1	0	0.423	0	0.423	1	1
>60	41	20		13		1		1		3		2		2		1		2		1		1		1		0
Smoking history
Never	76	39	0.764	29	0.685	7	>0.999	7	0.835	5	>0.999	4	0.574	3	>0.999	3	>0.999	1	0.388	1	0.388	1	1	0	0.216	0	0.216
Ever (Current/Former)	21	10		7		2		1		1		0		1		0		1		1		0		1		1
Histologic type
Adenocarcinoma	80	46	<0.001	31	0.833	9	0.757	7	>0.999	6	>0.999	3	0.544	3	0.544	2	0.443	1	0.321	1	0.321	1	1	0	0.052	0	0.052
Squamous cell carcinoma	12	0		4		0		1		0		1		1		1		1		1		0		0		0
Others	5	3		1		0		0		0		0		0		0		0		0		0		1		1
Stage at diagnosis
I/II	10	3	0.053	1	0.068	0	0.833	0	0.833	0	0.79	0	1	1	0.22	0	0.542	1	0.211	0	1	0	1	1	0.103	0	0.227
III	12	3		7		1		1		0		0		1		1		0		0		0		0		1
IV	75	43		28		8		7		6		4		2		2		1		2		1		0		0
Tumor size
T1	11	9	0.187	2	0.184	0	0.087	2	0.227	2	0.098	0	0.583	0	0.354	0	0.725	2	0.012	0	0.053	0	0.32	0	>0.999	0	0.536
T2	45	21		17		8		5		1		2		1		1		0		0		0		1		0
T3	21	10		6		1		1		1		2		1		1		0		0		0		0		1
T4	20	9		11		0		0		2		0		2		1		0		2		1		0		0
Lymph nodes
N0	16	8	>0.999	4	0.432	0	0.613	0	0.649	0	0.532	0	0.253	0	0.424	1	0.588	1	0.4	1	0.07	1	0.268	0	0.103	0	>0.999
N1	10	5		2		1		1		0		0		1		0		0		1		0		1		0
N2	43	22		18		5		4		3		4		1		2		0		0		0		0		1
N3	28	14		12		3		3		3		0		2		0		1		0		0		0		0
Metastasis
M0	23	6	0.007	8	0.791	1	0.602	1	0.731	0	0.33	0	0.57	2	0.238	1	0.56	1	0.42	1	0.42	1	0.237	1	0.237	1	0.237
M1	74	43		28		8		7		6		4		2		2		1		1		0		0		0
CEA (ng/ml)
≤5	31	11	0.042	9	0.259	2	0.778	0	0.104	2	1	3	0.095	3	0.095	1	1	2	1	1	0.539	0	1	0	1	1	0.32
>5	66	38		27		7		8		4		1		1		2		0		1		1		1		0
NSE (ng/ml)
≤16.3	48	23	0.612	20	0.358	0	0.003	1	0.059	1	0.204	4	0.056	4	0.056	3	0.117	0	0.495	1	1	1	0.495	1	0.495	0	1
>16.3	49	26		16		9		7		5		0		0		0		2		1		0		0		1
CYFRA21-1 (ng/ml)
≤3.3	30	11	0.068	11	0.951	1	0.331	2	1	2	1	2	0.585	2	0.585	3	0.028	1	0.525	0	1	0	1	0	1	1	0.309
>3.3	67	38		25		8		6		4		2		2		0		1		2		1		1		0
SCC (ng/ml)
≤2.7	89	46	0.487	32	0.685	8	1	7	1	6	1	4	1	3	0.295	2	0.23	2	1	1	0.159	0	0.082	1	1	1	1
>2.7	8	3		4		1		1		0		0		1		1		0		1		1		0		0
CA-125 (U/ml)
≤35	45	20	0.266	16	0.768	1	0.035	2	0.279	4	0.411	4	0.043	2	1	2	0.595	1	1	1	1	1	0.464	1	0.464	1	0.464
>35	52	29		20		8		6		2		0		2		1		1		1		0		0		0
